# Supplementary material for: Mitochondrial inner membrane permeabilisation enables mtDNA release during apoptosis
Source: PubMed Central journal article supplement (PMC6120664; doi:10.15252/embj.201899238), 2018-07-26

Fig 2A

| Hours | Control  |          |          | QVD      |          |          | ABT-737/S63845 |          |          | ABT-737/S63845/QVD |          |          |
|-------|----------|----------|----------|----------|----------|----------|----------------|----------|----------|--------------------|----------|----------|
| 0     | 0        | 0.0795   | 0.099375 | 0.059625 | 0.09605  | 0.086125 | 0.07285        | 0.033075 | 0.059625 | 0.069525           | 0.039725 | 0.096075 |
| 1     | 0.13915  | 0.13585  | 0.10935  | 0.099375 | 0.1226   | 0.089425 | 0.1027         | 0.06625  | 0.099375 | 0.109325           | 0.046325 | 0.106025 |
| 2     | 0.125875 | 0.139175 | 0.13915  | 0.1027   | 0.115975 | 0.099375 | 0.437475       | 0.285    | 0.3281   | 0.125925           | 0.0596   | 0.0994   |
| 3     | 0.152425 | 0.152425 | 0.16235  | 0.122575 | 0.135875 | 0.106    | 1.766625       | 1.402025 | 1.40205  | 0.169              | 0.159075 | 0.165675 |
| 4     | 0.15245  | 0.15575  | 0.169    | 0.115975 | 0.14245  | 0.132525 | 2.790875       | 2.108025 | 1.9125   | 0.222025           | 0.222025 | 0.25185  |
| 5     | 0.165675 | 0.159075 | 0.159075 | 0.1193   | 0.15905  | 0.13585  | 3.450475       | 2.446125 | 2.615175 | 0.2618             | 0.338025 | 0.324775 |
| 6     | 0.1889   | 0.165675 | 0.178925 | 0.13585  | 0.1723   | 0.122575 | 3.7985         | 2.837275 | 3.0925   | 0.3745             | 0.4242   | 0.377825 |
| 7     | 0.1922   | 0.159075 | 0.19885  | 0.152425 | 0.19885  | 0.1292   | 4.1101         | 3.032825 | 3.344425 | 0.500475           | 0.536925 | 0.510425 |
| 8     | 0.2154   | 0.182275 | 0.208775 | 0.185575 | 0.205475 | 0.17565  | 4.39845        | 3.26815  | 3.493575 | 0.609825           | 0.642975 | 0.652925 |
| 9     | 0.218725 | 0.175625 | 0.231975 | 0.1756   | 0.19885  | 0.175625 | 4.4084         | 3.31125  | 3.533325 | 0.702675           | 0.782225 | 0.79215  |
| 10    | 0.238575 | 0.205475 | 0.22865  | 0.185575 | 0.218725 | 0.1657   | 4.60725        | 3.301325 | 3.6394   | 0.8452             | 0.875    | 0.911475 |
| 11    | 0.2618   | 0.195525 | 0.208775 | 0.168975 | 0.22205  | 0.172325 | 4.729875       | 3.55985  | 3.702375 | 0.9844             | 1.09045  | 1.0971   |
| 12    | 0.255175 | 0.24525  | 0.2585   | 0.165675 | 0.2585   | 0.17895  | 4.8923         | 3.55985  | 3.841625 | 1.126925           | 1.252875 | 1.186575 |
| 13    | 0.255175 | 0.2353   | 0.285025 | 0.17895  | 0.261775 | 0.2187   | 5.071325       | 3.619525 | 3.798475 | 1.329125           | 1.4683   | 1.3954   |
| 14    | 0.251875 | 0.258525 | 0.251875 | 0.1723   | 0.2817   | 0.258475 | 5.05475        | 3.662625 | 3.8615   | 1.511425           | 1.58435  | 1.567775 |
| 15    | 0.265125 | 0.281725 | 0.28835  | 0.17895  | 0.285025 | 0.278375 | 5.164125       | 3.7256   | 3.94435  | 1.710325           | 1.783225 | 1.70035  |
| 16    | 0.285    | 0.314825 | 0.291625 | 0.195525 | 0.3082   | 0.331425 | 5.306675       | 3.675875 | 3.924475 | 1.899225           | 1.94895  | 1.829625 |
| 17    | 0.29495  | 0.301575 | 0.291625 | 0.202175 | 0.33145  | 0.3248   | 5.329875       | 3.7057   | 4.0637   | 2.0517             | 2.064975 | 1.98875  |
| 18    | 0.334725 | 0.3546   | 0.298275 | 0.225325 | 0.328075 | 0.377825 | 5.30005        | 3.646025 | 4.1565   | 2.19755            | 2.3003   | 2.17435  |
| 19    | 0.29165  | 0.344675 | 0.3281   | 0.24855  | 0.3712   | 0.38115  | 5.1774         | 3.709025 | 4.047075 | 2.2539             | 2.456075 | 2.24725  |
| 20    | 0.344675 | 0.354625 | 0.3513   | 0.27505  | 0.407625 | 0.45405  | 5.246975       | 3.6626   | 4.1565   | 2.426225           | 2.58205  | 2.316875 |
| 21    | 0.324825 | 0.43085  | 0.3546   | 0.27175  | 0.417575 | 0.38445  | 5.187325       | 3.64605  | 4.10675  | 2.4826             | 2.668225 | 2.363275 |
| 22    | 0.3546   | 0.3712   | 0.354625 | 0.3314   | 0.5137   | 0.4176   | 5.28675        | 3.609575 | 4.086875 | 2.635075           | 2.847225 | 2.4826   |
| 23    | 0.348    | 0.410975 | 0.41095  | 0.31815  | 0.4938   | 0.410975 | 5.19065        | 3.60295  | 4.03715  | 2.7345             | 2.88365  | 2.5754   |
| 24    | 0.3745   | 0.500475 | 0.454025 | 0.367875 | 0.6032   | 0.517025 | 4.53105        | 3.75875  | 4.33215  | 2.98975            | 3.201875 | 2.8671   |

Fig 2C

| <i>lfnb1</i> |        |        | <i>lrf7</i> |      |      | <i>Oasl1</i> |       |       |
|--------------|--------|--------|-------------|------|------|--------------|-------|-------|
| 0h           | 3h     | 8h     | 0h          | 3h   | 8h   | 0h           | 3h    | 8h    |
| 0.99         | 167.87 | 127.33 | 1.27        | 1.98 | 1.75 | 1.95         | 13.99 | 15.27 |
| 1.04         | 190.13 | 123.83 | 0.87        | 1.6  | 1.97 | 0.71         | 14.99 | 17.95 |
| 0.98         | 180.34 | 95.04  | 0.9         | 2.13 | 1.77 | 0.72         | 17.18 | 16.41 |

Fig 2D

| <i>lfnb1</i> |         |         |
|--------------|---------|---------|
| Untreated    | 2h -QVD | 2h +QVD |
| 1.36         | 3.73    | 73.42   |
| 0.47         | 4.23    | 83.32   |
| 1.56         | 4.48    | 73.02   |

Fig 2F

|                            | <i>lfnb1</i> |          |          |                    |          |          |
|----------------------------|--------------|----------|----------|--------------------|----------|----------|
|                            | Untreated    |          |          | ABT-737/S63845/QVD |          |          |
| EMPTY <sup>CRISPR</sup>    | 0.544771     | 1.164145 | 1.576809 | 185.1186           | 195.7593 | 213.5612 |
| STING <sup>CRISPR #1</sup> | 0.776829     | 1.183569 | 1.08763  | 13.67806           | 12.39962 | 10.3782  |
| STING <sup>CRISPR #2</sup> | 1.053269     | 0.976844 | 0.971931 | 7.650145           | 7.219899 | 6.943666 |
| STING <sup>CRISPR #3</sup> | 1.220512     | 0.892007 | 0.918522 | 41.71678           | 41.51345 | 40.11172 |

Fig 2H

|                           | <i>lfnb1</i> |          |          |                    |          |          |
|---------------------------|--------------|----------|----------|--------------------|----------|----------|
|                           | Untreated    |          |          | ABT-737/S63845/QVD |          |          |
| EMPTY <sup>CRISPR</sup>   | 0.865441     | 0.998849 | 1.156812 | 86.83372           | 99.04528 | 110.7511 |
| BAX <sup>CRISPR</sup>     | 0.883305     | 0.991826 | 1.141442 | 71.07622           | 81.69583 | 86.45236 |
| BAK <sup>CRISPR</sup>     | 0.774513     | 0.99639  | 1.295812 | 81.80103           | 70.32348 | 82.6251  |
| BAX/BAK <sup>CRISPR</sup> | 1.004557     | 0.970778 | 1.025429 | 23.48593           | 25.61202 | 24.79303 |

**Fig 2E**

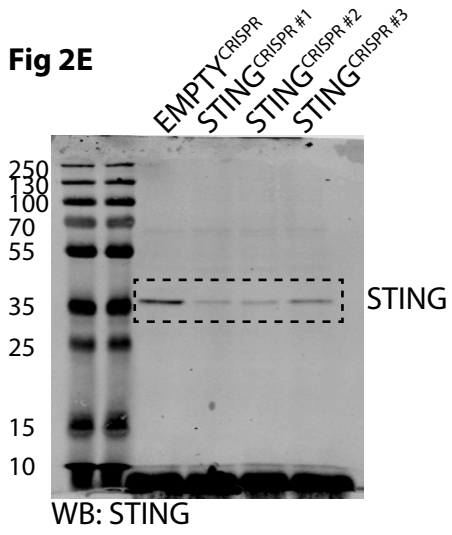

**Fig 2G**

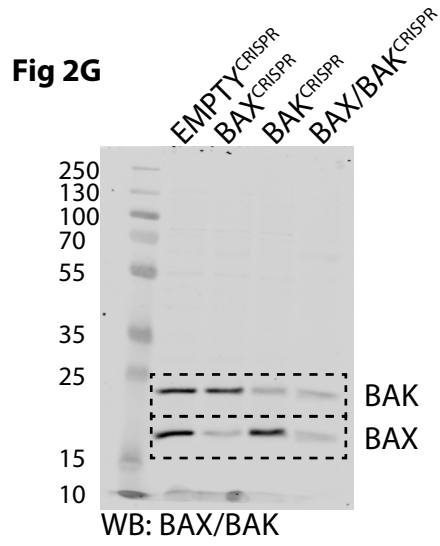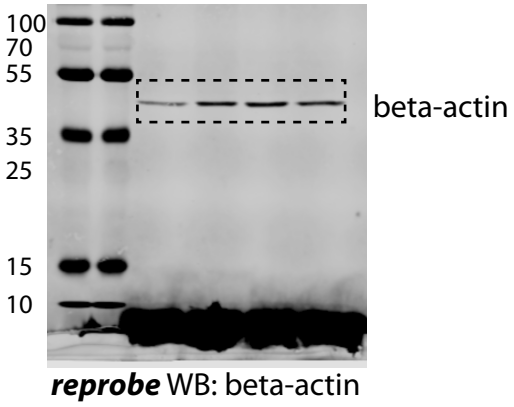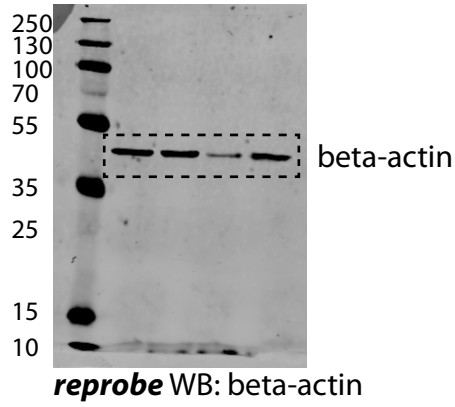

Supplement: EMBJ-37-e99238-s013.pdf [file EMBJ-37-e99238-s013.pdf]
