# Supplementary material for: Mitochondrial inner membrane permeabilisation enables mtDNA release during apoptosis
Source: PubMed Central journal article supplement (PMC6120664; doi:10.15252/embj.201899238), 2018-07-26
Supplement: EMBJ-37-e99238-s012.pdf [file EMBJ-37-e99238-s012.pdf]

Fig 1C

| Untreated | ABT-737/ActD/QVD |
|-----------|------------------|
| 0         | 100              |
| 0         | 100              |
| 0         | 85.71            |
| 0         | 80               |
| 0         | 98.38            |
| 0         | 100              |
| 0         | 100              |
| 0         | 100              |
| 0         | 100              |
| 0         | 100              |

Fig 1D

| Untreated | ABT-737/ActD/QVD |
|-----------|------------------|
| 4.68      | 83.44            |
| 5.33      | 85.15            |
| 4.54      | 81.81            |
| 2.56      | 73.84            |
| 2.85      | 80.51            |
| 3.84      | 77.87            |
|           | 80.64            |

Fig 1G

| Hours | U2OS EMPTY <sup>CRISPR</sup> | ABT-737/S63845 | U2OS BAX <sup>CRISPR</sup> | ABT-737/S63845 | U2OS BAK <sup>CRISPR</sup> | ABT-737/S63845 | U2OS BAX/BAK <sup>CRISPR</sup> | ABT-737/S63845 |            |            |           |           |
|-------|------------------------------|----------------|----------------------------|----------------|----------------------------|----------------|--------------------------------|----------------|------------|------------|-----------|-----------|
| 0     | 0.1092598                    | 0.1912046      | 0.05462988                 | 0.1578117      | 0.0526039                  | 0.1315097      | 0.1027749                      | 0.05138746     | 0.03425831 | 0.09228952 | 0.184579  | 0.2461054 |
| 1     | 0.2185195                    | 0.2185195      | 0.1365747                  | 0.1578117      | 0.2367175                  | 0.1578117      | 0.1199041                      | 0.08564577     | 0.1370332  | 0.1538159  | 0.3076317 | 0.2768686 |
| 2     | 0.1638896                    | 0.464354       | 0.3004644                  | 0.1578117      | 0.2630195                  | 0.2630195      | 0.1712915                      | 0.1712915      | 0.222679   | 0.1538159  | 0.3383949 | 0.2768686 |
| 3     | 0.2458345                    | 0.7375034      | 0.7921333                  | 0.4208311      | 0.5786428                  | 0.5523409      | 0.4967455                      | 0.445358       | 0.5652621  | 0.09228952 | 0.3691581 | 0.3076317 |
| 4     | 0.9560229                    | 1.584267       | 1.693526                   | 0.999474       | 0.973172                   | 0.8942662      | 0.9421034                      | 0.890716       | 1.233299   | 0.06152635 | 0.3999212 | 0.3383949 |
| 5     | 1.693526                     | 2.48566        | 2.594919                   | 1.735928       | 1.709627                   | 1.946344       | 1.490236                       | 1.524495       | 1.901336   | 0.09228952 | 0.3691581 | 0.3691581 |
| 6     | 2.594919                     | 3.933352       | 3.550942                   | 3.077328       | 2.446081                   | 3.051026       | 2.380952                       | 2.500856       | 2.963344   | 0.09228952 | 0.3383949 | 0.3999212 |
| 7     | 3.796777                     | 5.408359       | 5.025949                   | 4.103104       | 3.366649                   | 4.208312       | 3.117506                       | 3.374443       | 3.768414   | 0.09228952 | 0.3691581 | 0.4922107 |
| 8     | 4.53428                      | 6.364381       | 6.255122                   | 5.576013       | 4.418727                   | 5.234087       | 3.871189                       | 4.213772       | 4.710517   | 0.1230527  | 0.4614476 | 0.5845003 |
| 9     | 5.244469                     | 7.265774       | 6.96531                    | 7.02262        | 5.339295                   | 6.128354       | 4.65913                        | 5.121617       | 5.618362   | 0.1230527  | 0.4922107 | 0.5845003 |
| 10    | 5.599563                     | 8.740781       | 7.975963                   | 8.311415       | 6.338769                   | 6.89111        | 5.361425                       | 5.823912       | 6.594724   | 0.2461054  | 0.522974  | 0.6460266 |
| 11    | 6.364381                     | 9.724119       | 8.713467                   | 9.521304       | 7.15413                    | 7.916886       | 6.08085                        | 6.611854       | 7.69099    | 0.2768686  | 0.6460266 | 0.7690793 |
| 12    | 6.774106                     | 10.73477       | 9.478285                   | 10.25776       | 7.995792                   | 8.78485        | 6.491949                       | 7.416924       | 8.376156   | 0.3383949  | 0.6152635 | 0.7998425 |
| 13    | 7.293089                     | 11.60885       | 9.942638                   | 11.12572       | 8.521831                   | 9.337191       | 7.108599                       | 8.067831       | 9.164097   | 0.4614476  | 0.6152635 | 0.7998425 |
| 14    | 7.648183                     | 12.72876       | 10.35236                   | 11.57286       | 9.284587                   | 9.416097       | 7.69099                        | 8.633094       | 9.883522   | 0.522974   | 0.6152635 | 0.7998425 |
| 15    | 8.358372                     | 13.05654       | 10.70746                   | 12.1515        | 9.73172                    | 9.889532       | 8.10209                        | 9.078451       | 10.62008   | 0.4922107  | 0.5845003 | 0.8306057 |
| 16    | 8.549577                     | 13.82136       | 11.11718                   | 12.70384       | 10.15255                   | 10.25776       | 8.547448                       | 9.609455       | 11.28811   | 0.522974   | 0.6460266 | 0.892132  |
| 17    | 9.01393                      | 14.36766       | 11.49959                   | 13.01946       | 10.96791                   | 10.59968       | 8.958548                       | 9.934909       | 11.76773   | 0.4922107  | 0.6767898 | 0.8306057 |
| 18    | 9.068561                     | 14.85933       | 11.99126                   | 13.30878       | 11.46765                   | 10.88901       | 9.318259                       | 10.38027       | 12.19596   | 0.6152635  | 0.707553  | 0.8306057 |
| 19    | 9.560229                     | 15.21442       | 12.23709                   | 13.65071       | 11.80957                   | 11.36244       | 9.472422                       | 10.70572       | 12.35012   | 0.6460266  | 0.707553  | 0.9228952 |
| 20    | 9.806064                     | 15.76072       | 12.45561                   | 14.01894       | 11.86218                   | 11.59916       | 9.746489                       | 11.08256       | 12.72696   | 0.707553   | 0.6767898 | 0.9228952 |
| 21    | 9.915323                     | 15.97924       | 12.72876                   | 14.17675       | 12.04629                   | 11.88848       | 9.832134                       | 11.16821       | 13.01816   | 0.7998425  | 0.7383162 | 0.9228952 |
| 22    | 10.16116                     | 16.17044       | 12.86534                   | 14.49237       | 12.33561                   | 12.04629       | 10.19185                       | 11.4594        | 13.27509   | 0.8613688  | 0.7690793 | 0.8613688 |
| 23    | 10.5982                      | 16.27971       | 13.05654                   | 14.8343        | 12.91426                   | 12.2041        | 10.1062                        | 11.6307        | 13.58342   | 0.9228952  | 0.707553  | 0.9844216 |
| 24    | 10.7894                      | 16.60748       | 13.38432                   | 15.01841       | 12.96686                   | 12.49342       | 10.32888                       | 11.81912       | 13.73758   | 0.9228952  | 0.8306057 | 0.9844216 |

Fig 1I

| EMPTY <sup>CRISPR</sup> | BAX <sup>CRISPR</sup> | BAK <sup>CRISPR</sup> | BAX/BAK <sup>CRISPR</sup> |
|-------------------------|-----------------------|-----------------------|---------------------------|
| 72.08                   | 83.33                 | 83.15                 | 5.29                      |
| 71.3                    | 85.71                 | 80.77                 | 6.37                      |
| 77.14                   | 89.13                 | 88.24                 | 13.9                      |
| 76.47                   | 88.19                 | 93.12                 | 15.32                     |
| 92.59                   | 89.02                 | 89.97                 | 13.71                     |
| 79.34                   | 81.19                 | 92.89                 | 6.8                       |
|                         | 72.53                 | 94.85                 | 9.05                      |

**Fig 1F**

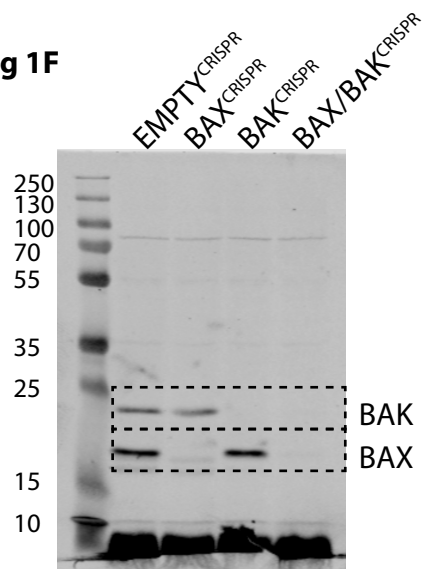

WB: BAX and BAK

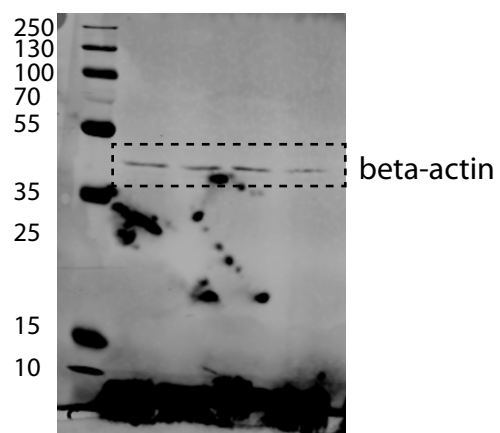

**reprobe** WB: beta-actin
