# Supplementary material for: Mitochondrial inner membrane permeabilisation enables mtDNA release during apoptosis
Source: PubMed Central journal article supplement (PMC6120664; doi:10.15252/embj.201899238), 2018-07-26
Supplement: EMBJ-37-e99238-s014.pdf [file EMBJ-37-e99238-s014.pdf]

**Fig 3D**

| Mins | Pore Size |       |       | Omi Release |          |          |
|------|-----------|-------|-------|-------------|----------|----------|
|      |           |       |       |             |          |          |
| 0    | 0         | 0     | 0     | 1           | 1        | 1        |
| 1    | 0         | 0     | 0     | 0.922689    | 0.977456 | 1.053168 |
| 2    | 0         | 0     | 0     | 0.843128    | 0.907561 | 0.927209 |
| 3    | 0         | 0     | 0     | 0.956277    | 0.949354 | 0.958964 |
| 4    | 0         | 0     | 0     | 0.858217    | 0.8774   | 0.932668 |
| 5    | 0         | 0     | 0     | 0.877579    | 1.085285 | 0.804707 |
| 6    | 0         | 0     | 0     | 0.920894    | 0.951773 | 0.864062 |
| 7    | 0         | 0     | 0     | 0.834129    | 0.924391 | 0.871038 |
| 8    | 0         | 0     | 0     | 0.823561    | 0.842658 | 0.821904 |
| 9    | 0         | 0     | 0     | 0.706118    | 0.706367 | 0.861272 |
| 10   | 0         | 0     | 0     | 0.619921    | 0.822585 | 0.828304 |
| 11   | 0         | 0     | 0     | 0.757181    | 0.953575 | 0.7553   |
| 12   | 0         | 0     | 0     | 0.918939    | 0.953163 | 0.751145 |
| 13   | 0         | 0     | 0     | 0.832924    | 0.931803 | 0.764005 |
| 14   | 0         | 0     | 0     | 0.644214    | 0.878995 | 0.838889 |
| 15   | 0         | 0     | 0     | 0.732479    | 1.051212 | 0.802372 |
| 16   | 0         | 0     | 0     | 0.437165    | 0.953111 | 0.804252 |
| 17   | 0         | 0     | 0     | 0.429552    | 0.840393 | 0.810257 |
| 18   | 0         | 0     | 0     | 0.230025    | 0.669    | 0.77465  |
| 19   | 0         | 0     | 0     | 0.168189    | 0.331978 | 0.765855 |
| 20   | 0         | 0     | 0     | 0.140055    | 0.284832 | 0.705195 |
| 21   | 0         | 0     | 0     | 0.108127    | 0.23259  | 0.499348 |
| 22   | 0         | 0     | 0     | 0.102491    | 0.211642 | 0.410391 |
| 23   | 0         | 0     | 0     | 0.095355    | 0.202584 | 0.250463 |
| 24   | 0         | 0     | 0     | 0.091287    | 0.196047 | 0.250463 |
| 25   | 0         | 0     | 0     | 0.09381     | 0.200165 | 0.23278  |
| 26   | 0.171     | 0.242 | 0     | 0.096537    | 0.190694 | 0.176943 |
| 27   | 0.259     | 0.57  | 0.245 | 0.090696    | 0.191312 | 0.139668 |
| 28   | 0.494     | 0.537 | 0.484 | 0.091355    | 0.216223 | 0.130205 |
| 29   | 0.815     | 1.316 | 0.57  | 0.091378    | 0.189459 | 0.127051 |
| 30   | 0.663     | 1.043 | 0.843 | 0.086992    | 0.186319 | 0.13154  |
| 31   | 0.79      | 1.212 | 0.831 | 0.088583    | 0.189408 | 0.123563 |
| 32   | 0.972     | 1.273 | 1.035 | 0.09081     | 0.181584 | 0.124534 |
| 33   | 1.028     | 1.266 | 0.929 | 0.085288    | 0.184569 | 0.121956 |
| 34   | 1.002     | 1.428 | 0.948 | 0.086288    | 0.184055 | 0.11777  |
| 35   | 0.955     | 1.398 | 1.099 | 0.090696    | 0.18493  | 0.120379 |
| 36   | 0.984     | 1.253 | 1.118 | 0.089583    | 0.17865  | 0.114191 |
| 37   | 1.05      | 1.291 | 1.093 | 0.094219    | 0.176798 | 0.113676 |
| 38   | 1.233     | 1.316 | 1.206 | 0.093423    | 0.171136 | 0.114616 |
| 39   | 1.269     | 1.263 | 1.316 | 0.087878    | 0.17443  | 0.111128 |
| 40   | 1.295     | 1.173 | 1.313 | 0.084538    | 0.163673 | 0.111249 |
| 41   | 1.294     | 1.24  | 1.22  | 0.082924    | 0.16357  | 0.115374 |
| 42   | 1.266     | 1.07  | 1.226 | 0.088674    | 0.162695 | 0.11595  |
| 43   | 1.269     | 1.194 | 1.191 | 0.118103    | 0.173401 | 0.113433 |
| 44   | 1.176     | 1.197 | 1.277 | 0.092605    | 0.173658 | 0.113918 |
| 45   | 1.196     | 1.138 | 1.348 | 0.12667     | 0.167224 | 0.115192 |
| 46   | 1.208     | 1.178 | 1.176 | 0.165462    | 0.165063 | 0.111522 |
| 47   | 1.274     | 1.28  | 1.247 | 0.172234    | 0.164548 | 0.111067 |
| 48   | 1.138     | 1.159 | 1.084 | 0.202868    | 0.153842 | 0.127021 |
| 49   | 1.12      | 1.11  | 1.206 | 0.263749    | 0.154563 | 0.124473 |
| 50   | 1.171     | 1.123 | 1.222 | 0.280952    | 0.159092 | 0.122047 |
| 51   | 1.065     | 1.088 | 1.212 | 0.186869    | 0.152761 | 0.115344 |
| 52   | 1.172     | 1.063 | 1.335 | 0.128238    | 0.159658 | 0.114495 |
| 53   | 0.987     | 1.103 | 1.096 | 0.110944    | 0.162901 | 0.115071 |
| 54   | 0.897     | 1.193 | 1.158 | 0.112285    | 0.149828 | 0.119651 |
| 55   | 1.015     | 1.038 | 0.951 | 0.079925    | 0.146534 | 0.115586 |
| 56   | 0.982     | 1.043 | 1.081 | 0.072721    | 0.145761 | 0.107458 |
| 57   | 0.965     | 1.139 | 1.135 | 0.073448    | 0.149673 | 0.101999 |
| 58   | 0.997     | 1.141 | 1.065 | 0.073152    | 0.143034 | 0.104    |
| 59   | 0.953     | 1.024 | 1.026 | 0.072357    | 0.144063 | 0.109793 |
| 60   | 0.897     | 1.19  | 0.95  | 0.072675    | 0.13907  | 0.101908 |
