# Supplementary material for: Mitochondrial inner membrane permeabilisation enables mtDNA release during apoptosis
Source: PubMed Central journal article supplement (PMC6120664; doi:10.15252/embj.201899238), 2018-07-26
Supplement: EMBJ-37-e99238-s015.pdf [file EMBJ-37-e99238-s015.pdf]

**Fig 5B**

| <b>Wt</b> | <b>Drp1-/-</b> |
|-----------|----------------|
| 70.73     | 64.28          |
| 68.88     | 66.66          |
| 69.56     | 58.62          |
|           | 82.85          |

**Fig 5G**

| <b>Wt</b> | <b>CypD-/-</b> |
|-----------|----------------|
| 83.93     | 92.59          |
| 82.76     | 89.19          |
| 81.25     | 97.22          |
| 68        | 77.14          |
| 71.95     | 70.37          |

**Fig 5E**

| <b>Omi Release</b> | <b>Calcein Release</b> |
|--------------------|------------------------|
| 0                  | 360                    |
| 0                  | 420                    |
| 0                  | 540                    |
| 0                  | 420                    |
| 0                  | 420                    |
| 0                  | 540                    |
| 0                  | 660                    |
| 0                  | 1260                   |
| 0                  | 1300                   |
| 0                  | 720                    |
| 0                  | 390                    |
| 0                  | 690                    |
| 0                  | 390                    |
| 0                  | 240                    |
